# Supplementary material for: A Solid-Phase Microextraction—Liquid Chromatography-Mass Spectrometry Method for Analyzing Serum Lipids in Psoriatic Disease
Source: MDPI journal article supplement (doi:10.3390/metabo13080963), 2023-08-20
Supplement: s1 [file s1]

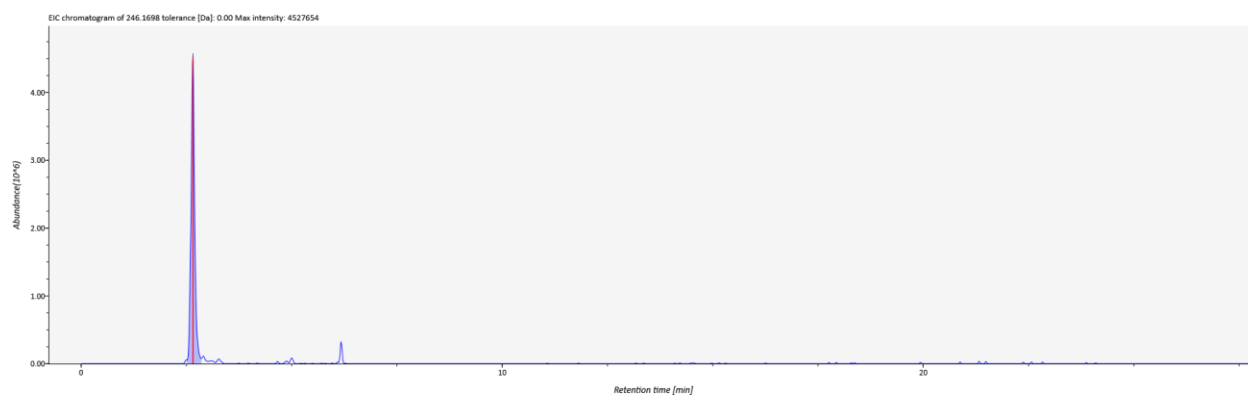

Figure S1. Extracted ion chromatogram for valerylcarnitine.

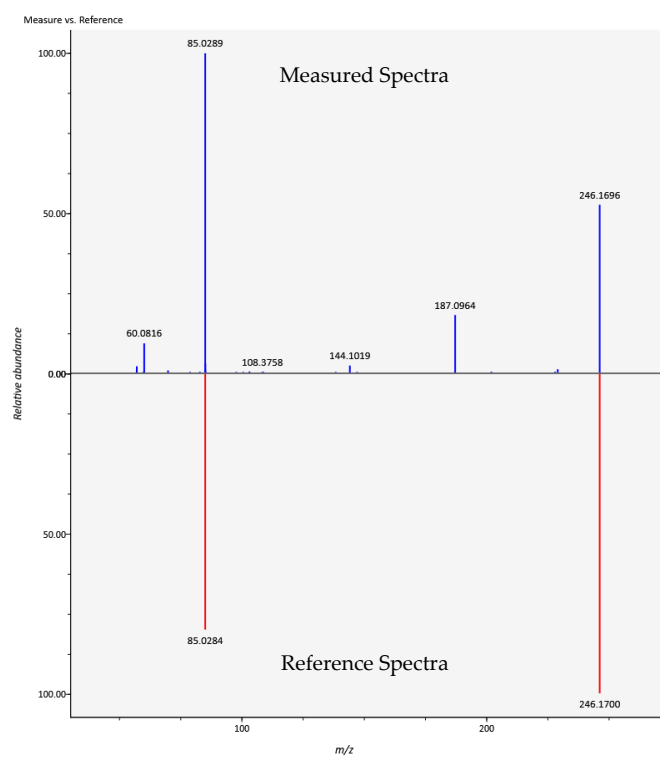

Figure S2. Measured versus reference MS/MS spectra for valerylcarnitine.

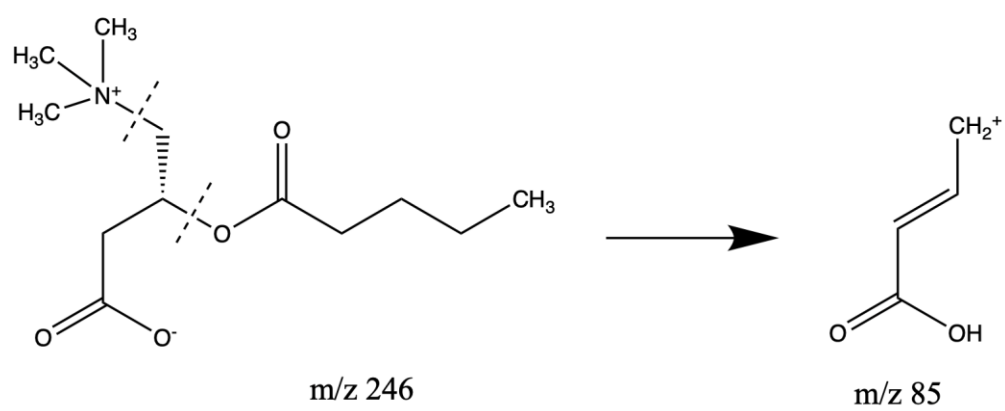

Figure S3. Proposed fragmentation pattern for valerylcarnitine.
